# Supplementary material for: Transposon-Directed Insertion-Site Sequencing Reveals Glycolysis Gene gpmA as Part of the H2O2 Defense Mechanisms in Escherichia coli
Source: MDPI journal article supplement (doi:10.3390/antiox11102053), 2022-10-18
Supplement: s1 [file s1]

**Supplementary Table S1.** Primers used to validate the gene replacement by the kanamycin cassette from the Keio collection. Gene accession ID from Ecocyc database.

| Name              | Sequence                   | Gene accession ID | Reference  |
|-------------------|----------------------------|-------------------|------------|
| <u>gpmA_seq_F</u> | CCGATGCTCTGTTACGTCAAC      | EG11699           | This study |
| <u>gpmA_seq_R</u> | GCGAAGAGTATTCCAGCCTG       |                   | This study |
| <u>dksA_seq_F</u> | TCTTCTATGCGTACCAGCCAG      | EG10230           | This study |
| <u>dksA_seq_R</u> | TACATTCTGGTCGCGTGCG        |                   | This study |
| <u>rbsR_seq_F</u> | CATTGCCAGAGGCGATTCTG       | EG10819           | This study |
| <u>rbsR_seq_R</u> | GGAAGGCACAACGACTGTC        |                   | This study |
| <u>rpoS_seq_F</u> | GACAGTGTTAACGACCATTCTCG    | EG10510           | This study |
| <u>rpoS_seq_R</u> | GGAACCAGTTCAACACGCTTG      |                   | This study |
| <u>gpmM_seq_F</u> | CTGGCATCGGCTTGCC           | EG12296           | This study |
| <u>gpmM_seq_R</u> | TGGCGTAGATGATGGGCC         |                   | This study |
| <u>hfq_seq_F</u>  | GCTATCGCAGGCTGAATGTGTAC    | EG10438           | This study |
| <u>hfq_seq_R</u>  | GGTCAAACAAGCGTATAACCCTC    |                   | This study |
| <u>nhaA_seq_F</u> | GGCGCAAATTCTTCAATAGCTCG    | EG10652           | This study |
| <u>nhaA_seq_R</u> | ACGGAACCTTCTTTATAGACATGCC  |                   | This study |
| <u>corA_seq_F</u> | GTTGCTGTTAACACGAACAAATGG   | EG11463           | This study |
| <u>corA_seq_R</u> | GTTGCTGTTAACACGAACAAATGG   |                   | This study |
| <u>dps_seq_F</u>  | CCACTATTAGTGTGATAGGAACAGCC | EG11415           | This study |
| <u>dps_seq_R</u>  | CCACTATTAGTGTGATAGGAACAGCC |                   | This study |

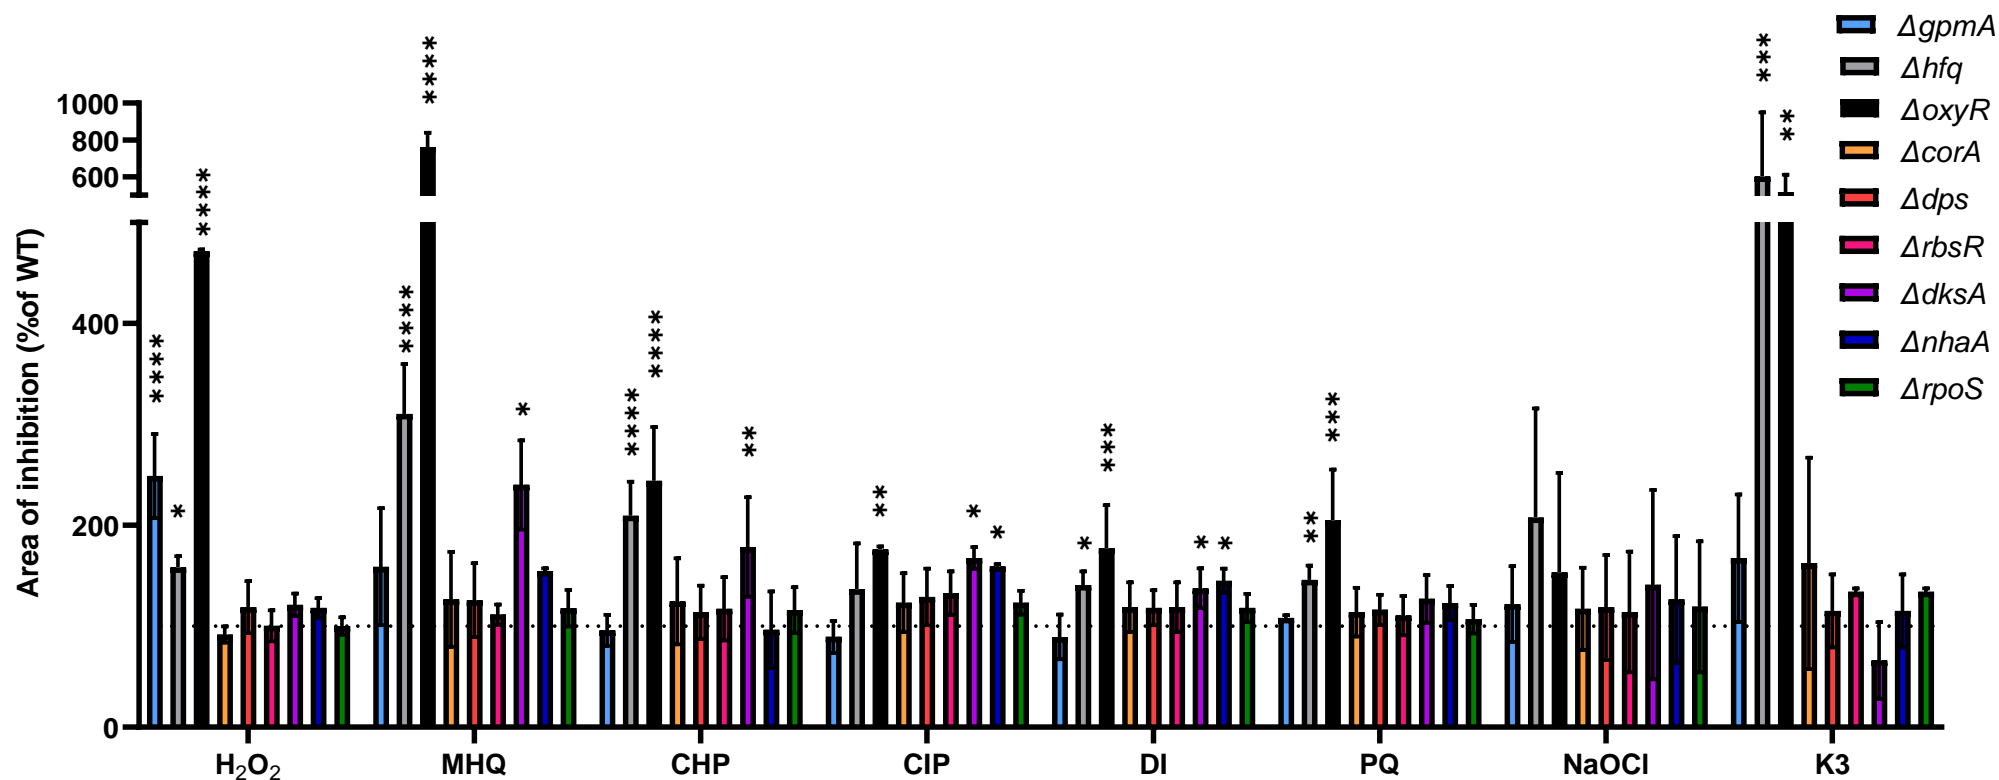

**Supplementary Figure S1. Sensitivity of the deletion mutants of the TraDIS exposed to various oxidants.** Quantification of the inhibition area normalized to WT for each oxidant and each gene deletion. Oxidant applied on each disk (CHP: cumene hydroperoxide, MHQ: methylhydroquinone,  $H_2O_2$ : hydrogen peroxide, CIP: ciprofloxacin, Di: diamide, AMP: ampicillin, K3: menadione, NaOCl: sodium hypochlorite, DMSO: dimethyl-sulfoxide); One-way ANOVA with Tukey multiple comparison was performed separately for each oxidant on the area of inhibition of the WT,  $\Delta katG$  and the 9 mutants identified by TraDIS. The significance of the difference with the WT is represented on the normalized data by stars where \*/\*\*/\*\*\*/\*\*\*\* correspond to  $p < 0.05$ , 0.01, 0.001, 0.0001 respectively (mean  $\pm$  SD, N=3).

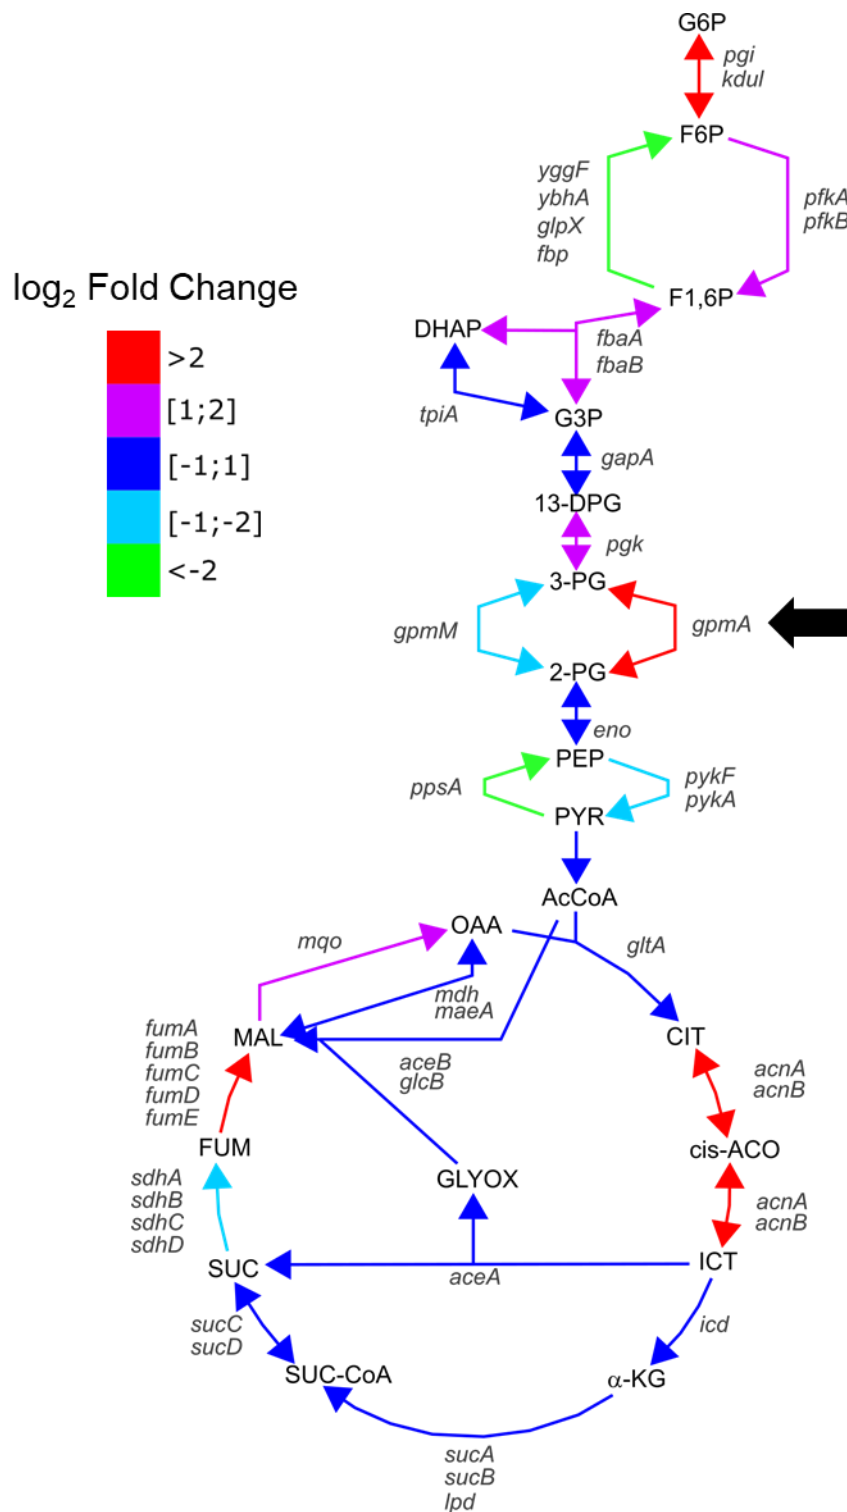

**Supplementary Figure S2. Schematic diagram of H<sub>2</sub>O<sub>2</sub>-induced transcriptional changes of glycolysis and TCA cycle.** The color code describes the differential expression of the genes coding for the enzyme catalyzing the described reactions 10 minutes after exposition to 2.5 mM H<sub>2</sub>O<sub>2</sub> compared to no treatment. The *gpmA* gene is indicated by a black arrow. Data from previously performed RNA-seq (deposited on ENA with the accession number: PRJEB51098).

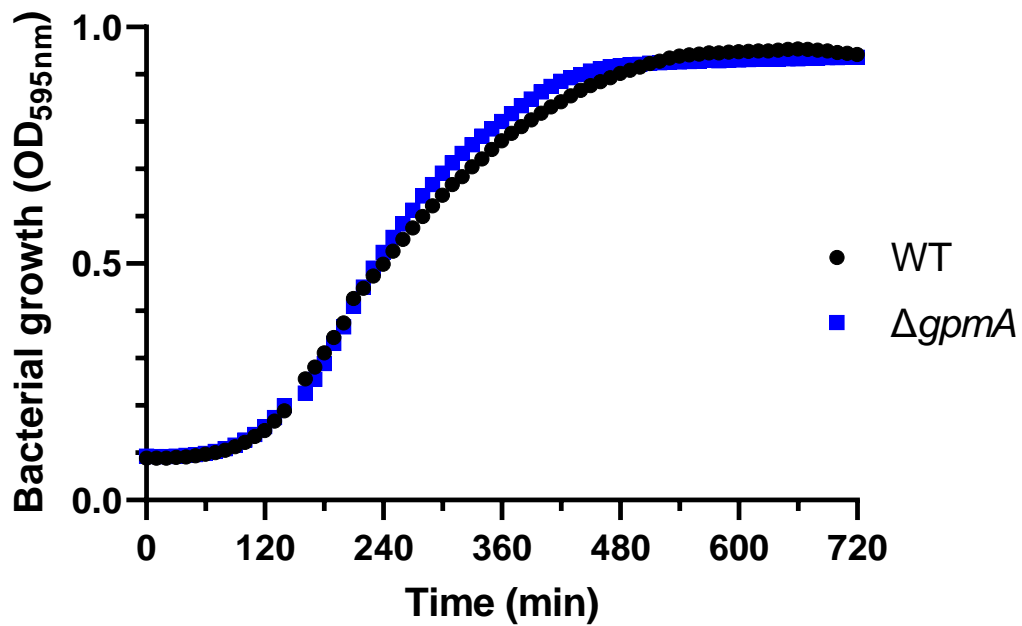

**Supplementary Figure S3. The deletion of *gpmA* did not affect bacterial growth.** Growth curves of the WT and the  $\Delta gpmA$  mutant in liquid LB over time (mean,  $N=3$ ).

An overnight culture of *E. coli* was normalized to 1.0 Mc Farland using a Densimat (bioMérieux) and further diluted 1:10 in fresh LB. This bacterial culture was grown in a volume of 1 mL in a 24-well plate (142475, ThermoFisher) and incubated at 37 °C with 5 mm orbital shaking in an Infinite 200PRO plate reader (Tecan). Absorbance was measured every 10 min at an optical density of 595 nm.
